# Supplementary material for: Effect of a Novel E3 Probiotics Formula on the Gut Microbiome in Atopic Dermatitis Patients: A Pilot Study
Source: MDPI journal article supplement (doi:10.3390/biomedicines10112904), 2022-11-11
Supplement: s1 [file s1]

| Type      | Group                  | Metric                             | p value | Sig. |
|-----------|------------------------|------------------------------------|---------|------|
| Responder | All_AD: Pre VS Post    | Jaccard distance metric            | 0.995   |      |
|           |                        | Bray-Curtis distance metric        | 0.997   |      |
|           |                        | Unweighted UniFrac distance metric | 0.742   |      |
|           |                        | Weighted UniFrac distance metric   | 0.376   |      |
|           | Mild_AD: Pre VS Post   | Jaccard distance metric            | 0.993   |      |
|           |                        | Bray-Curtis distance metric        | 1       |      |
|           |                        | Unweighted UniFrac distance metric | 0.606   |      |
|           |                        | Weighted UniFrac distance metric   | 0.956   |      |
|           | Severe_AD: Pre VS Post | Jaccard distance metric            | 0.971   |      |
|           |                        | Bray-Curtis distance metric        | 0.992   |      |
|           |                        | Unweighted UniFrac distance metric | 0.974   |      |
|           |                        | Weighted UniFrac distance metric   | 0.230   |      |
