# Supplementary material for: Effect of a Novel E3 Probiotics Formula on the Gut Microbiome in Atopic Dermatitis Patients: A Pilot Study
Source: MDPI journal article supplement (doi:10.3390/biomedicines10112904), 2022-11-11
Supplement: s1 [file s1]

| Measure       | Non-Responders: Pre VS Post |         |      |                 |         |      |                  |         |      |
|---------------|-----------------------------|---------|------|-----------------|---------|------|------------------|---------|------|
|               | ALL_AD (n=17)               |         |      | Mild_AD (n=3)   |         |      | Severe_AD (n=14) |         |      |
|               | trend(post-pre)             | p value | Sig. | trend(post-pre) | p value | Sig. | trend(post-pre)  | p value | Sig. |
| Observed_OTUs | ↑                           | 0.670   |      | ↓               | 0.766   |      | ↑                | 0.451   |      |
| Chao1         | ↑                           | 0.678   |      | ↓               | 0.737   |      | ↑                | 0.542   |      |
| ACE           | ↑                           | 0.644   |      | ↓               | 0.756   |      | ↑                | 0.426   |      |
| Shannon       | ↓                           | 0.729   |      | —               | 0.496   |      | ↓                | 0.732   |      |
| Simpson       | ↓                           | 0.875   |      | —               | 1       |      | ↓                | 0.894   |      |
| InvSimpson    | ↓                           | 0.649   |      | ↓               | 0.619   |      | ↓                | 0.611   |      |
| Fisher        | ↑                           | 0.644   |      | ↓               | 0.421   |      | ↑                | 0.426   |      |
| Coverage      | —                           | 0.754   |      | —               | 1       |      | —                | 0.724   |      |
| PD            | ↓                           | 0.680   |      | ↓               | 0.167   |      | ↓                | 0.591   |      |
