# Supplementary material for: Effect of a Novel E3 Probiotics Formula on the Gut Microbiome in Atopic Dermatitis Patients: A Pilot Study
Source: MDPI journal article supplement (doi:10.3390/biomedicines10112904), 2022-11-11
Supplement: s1 [file s1]

| Type          | Group                  | Metric                             | <i>p</i> value | Sig. |
|---------------|------------------------|------------------------------------|----------------|------|
| Non-Responder | All_AD: Pre VS Post    | Jaccard distance metric            | 0.999          |      |
|               |                        | Bray-Curtis distance metric        | 0.999          |      |
|               |                        | Unweighted UniFrac distance metric | 0.962          |      |
|               |                        | Weighted UniFrac distance metric   | 0.903          |      |
|               | Mild_AD: Pre VS Post   | Jaccard distance metric            | 0.717          |      |
|               |                        | Bray-Curtis distance metric        | 1              |      |
|               |                        | Unweighted UniFrac distance metric | 0.778          |      |
|               |                        | Weighted UniFrac distance metric   | 0.9            |      |
|               | Severe_AD: Pre VS Post | Jaccard distance metric            | 0.999          |      |
|               |                        | Bray-Curtis distance metric        | 0.999          |      |
|               |                        | Unweighted UniFrac distance metric | 0.963          |      |
|               |                        | Weighted UniFrac distance metric   | 0.941          |      |
