# Supplementary material for: Effect of a Novel E3 Probiotics Formula on the Gut Microbiome in Atopic Dermatitis Patients: A Pilot Study
Source: MDPI journal article supplement (doi:10.3390/biomedicines10112904), 2022-11-11
Supplement: s1 [file s1]

| Measure       | Responders: Pre VS Post |         |      |                 |         |      |                  |         |      |
|---------------|-------------------------|---------|------|-----------------|---------|------|------------------|---------|------|
|               | ALL_AD (n=24)           |         |      | Mild_AD (n=14)  |         |      | Severe_AD (n=10) |         |      |
|               | trend(post-pre)         | p value | Sig. | trend(post-pre) | p value | Sig. | trend(post-pre)  | p value | Sig. |
| Observed_OTUs | ↑                       | 0.0001  | ***  | ↑               | 8.5E-05 | ***  | ↑                | 0.114   |      |
| Chao1         | ↑                       | 9.4e-05 | ***  | ↑               | 5.7e-05 | ***  | ↑                | 0.117   |      |
| ACE           | ↑                       | 0.0002  | ***  | ↑               | 9.1e-05 | ***  | ↑                | 0.108   |      |
| Shannon       | ↑                       | 0.159   |      | ↑               | 0.019   | **   | ↓                | 0.089   |      |
| Simpson       | ↑                       | 0.330   |      | ↑               | 0.140   |      | ↓                | 0.728   |      |
| InvSimpson    | ↑                       | 0.551   |      | ↑               | 0.271   |      | ↓                | 0.695   |      |
| Fisher        | ↑                       | 0.551   |      | ↑               | 0.0001  | ***  | ↑                | 0.113   |      |
| Coverage      | ↑                       | 0.996   |      | ↑               | 0.989   |      | ↓                | 0.894   |      |
| PD            | ↑                       | 0.211   |      | ↑               | 0.035   | **   | ↑                | 0.191   |      |
