# Supplementary figures and images for: Effect of a Novel E3 Probiotics Formula on the Gut Microbiome in Atopic Dermatitis Patients: A Pilot Study
Source: MDPI journal article supplement (doi:10.3390/biomedicines10112904), 2022-11-11

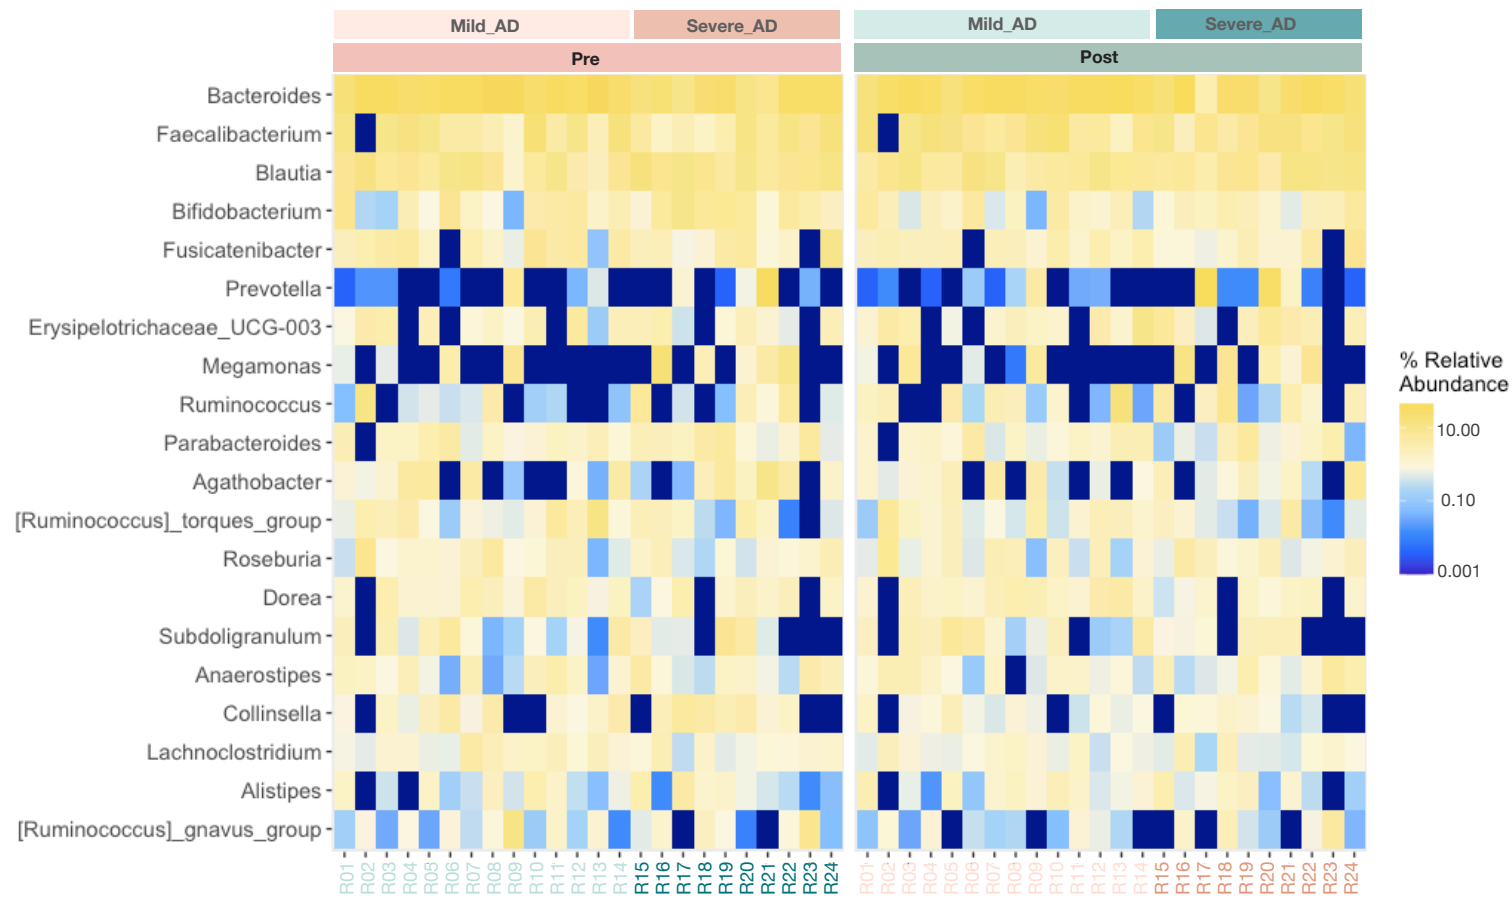

Supplement: s1 [file s1]

A

All\_AD

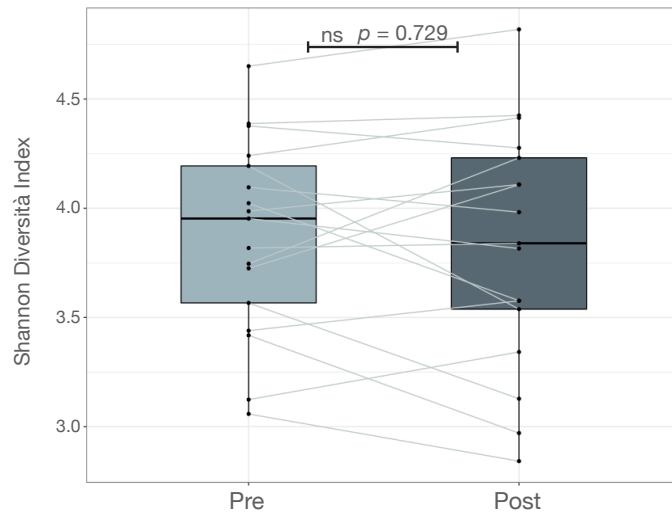

B

Mild\_AD

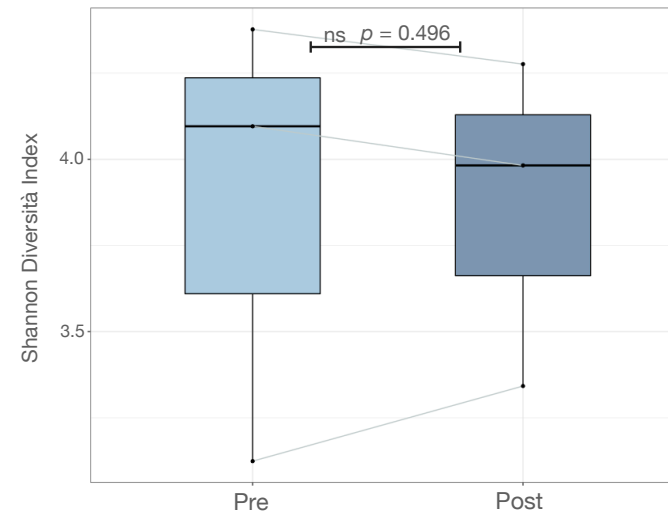

C

Severe\_AD

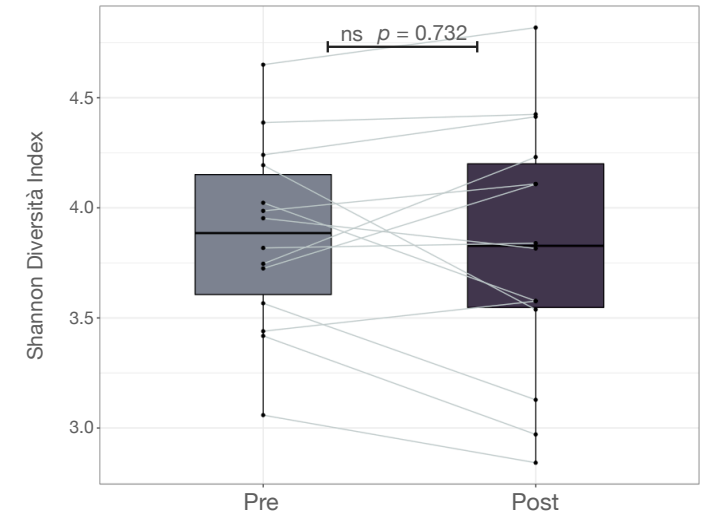

Supplement: s1 [file s1]

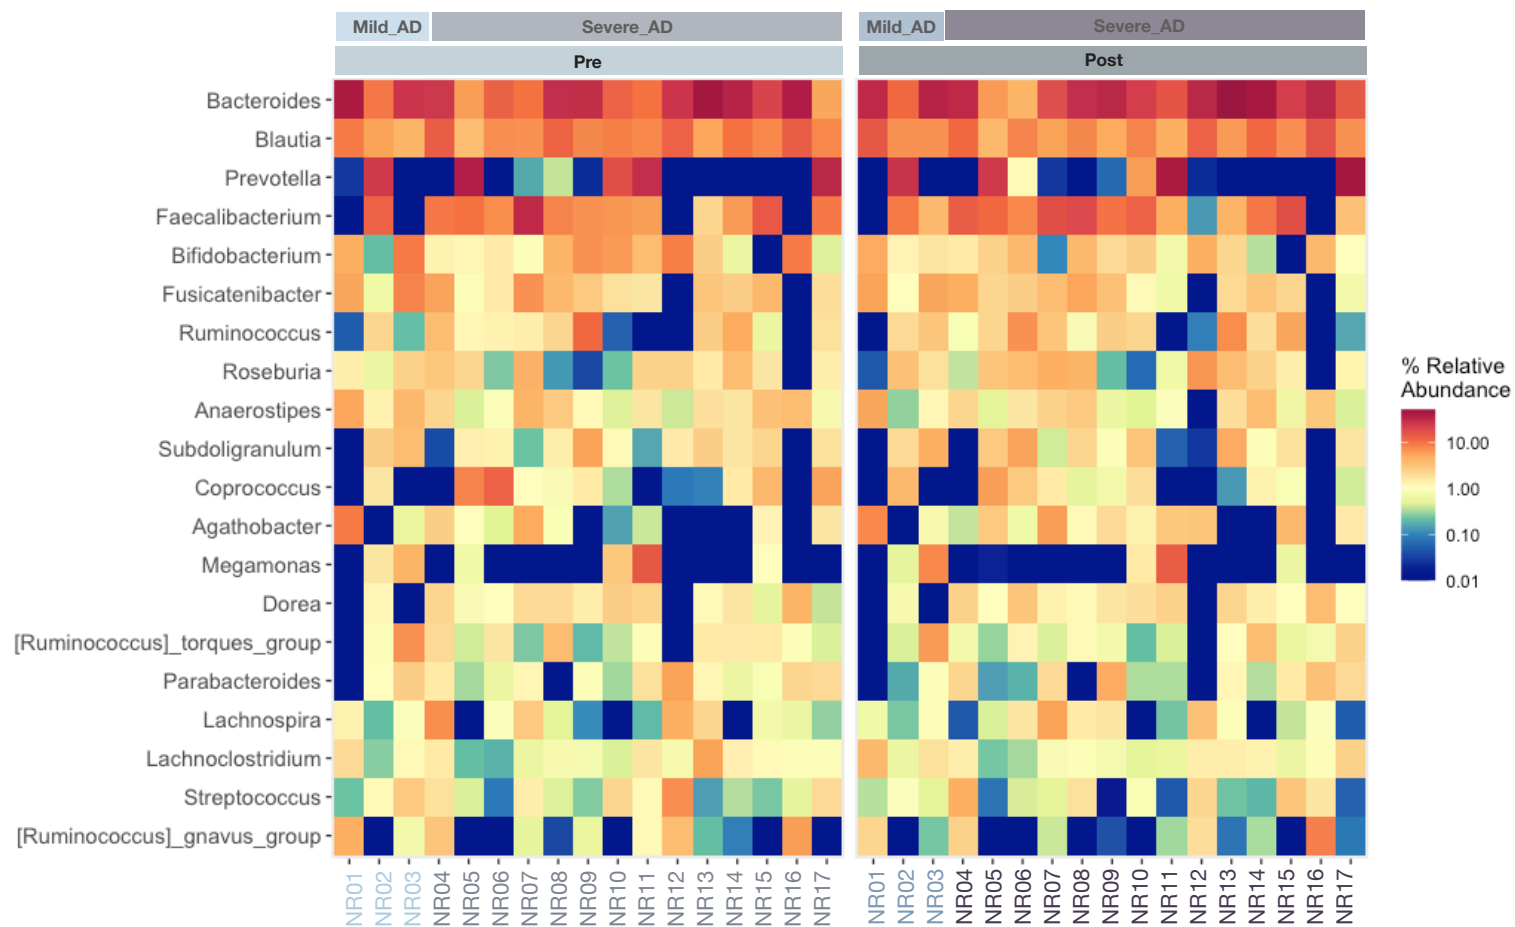

Supplement: s1 [file s1]

A

All\_AD

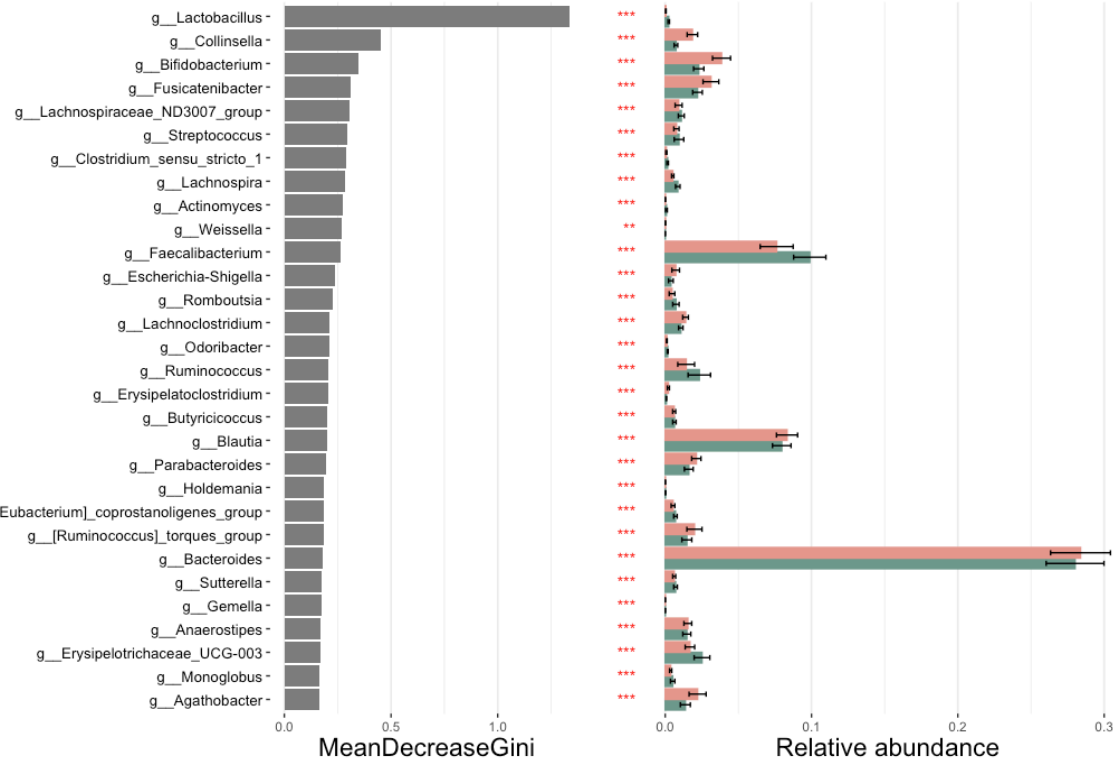

B

Mild\_AD

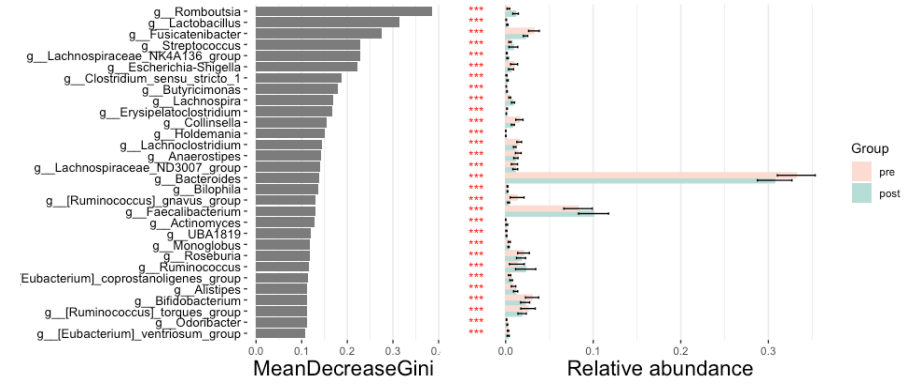

C

Severe\_AD

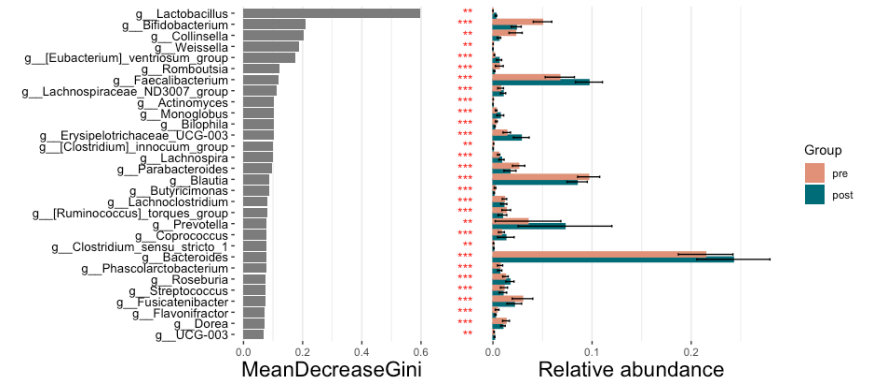

Supplement: s1 [file s1]

A

All\_AD

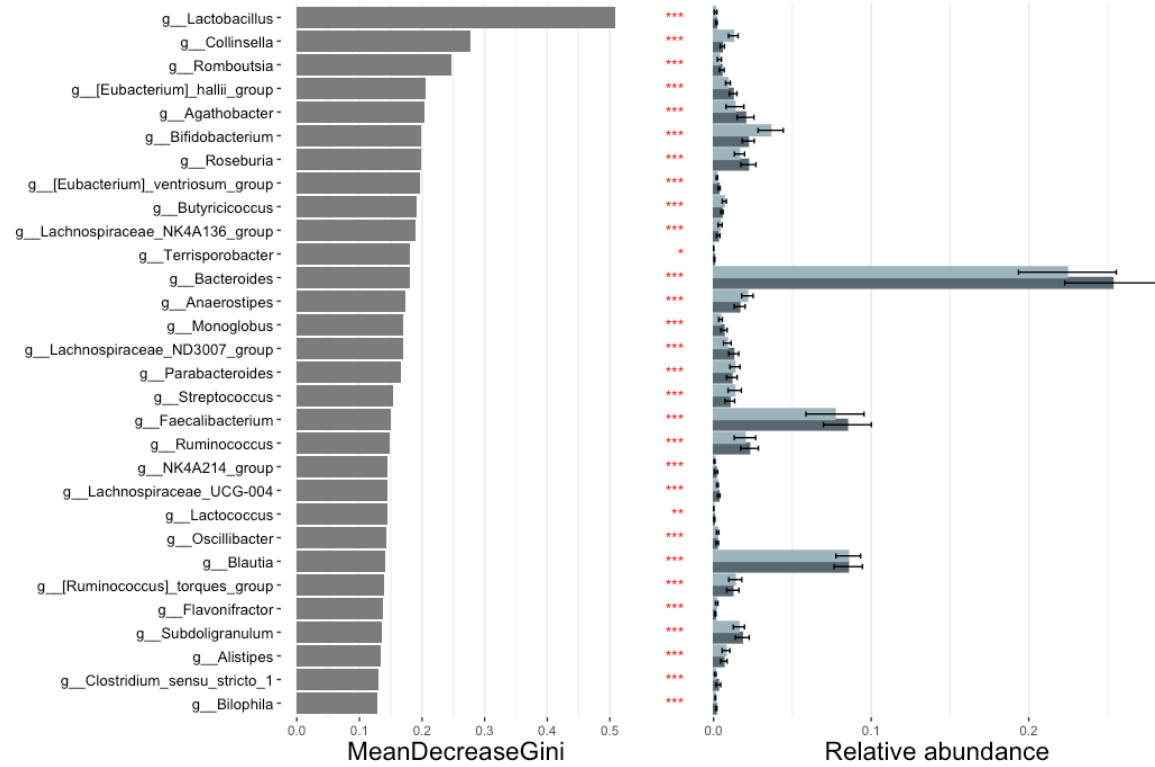

B

Mild\_AD

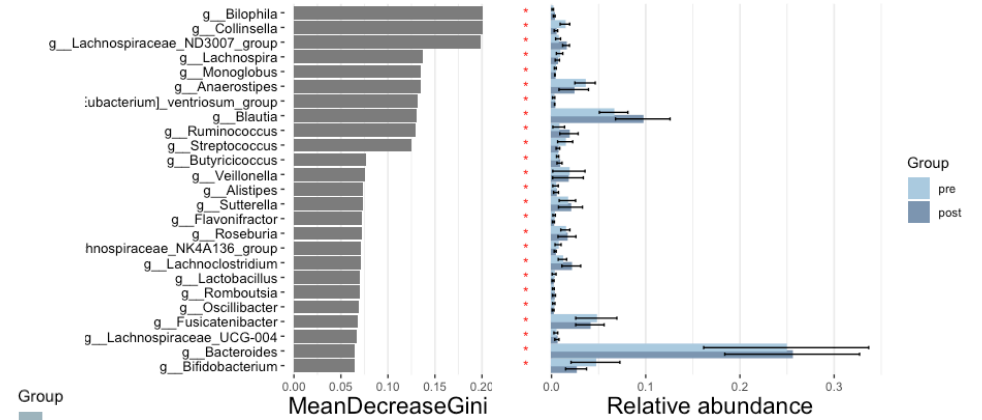Group  
pre  
post

C

Severe\_AD

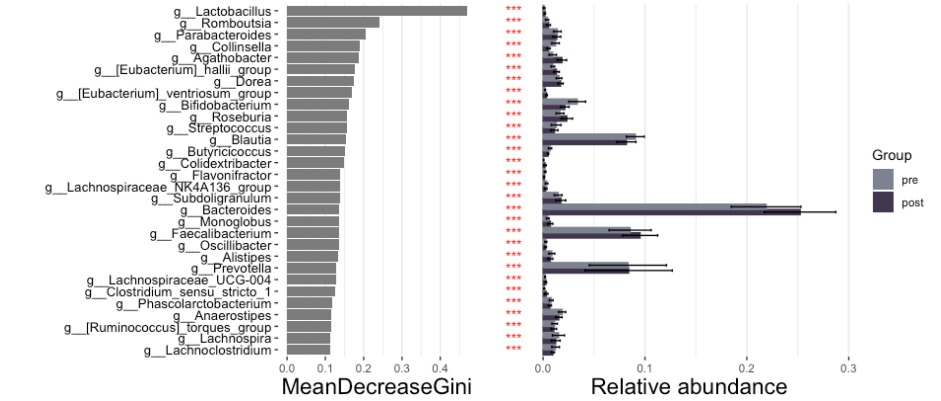Group  
pre  
post

Supplement: s1 [file s1]
